# Supplementary material for: The disappearing hand: vestibular stimulation does not improve hand localisation
Source: PeerJ. 2019 Jul 26;7:e7201. doi: 10.7717/peerj.7201 (PMC6662564; doi:10.7717/peerj.7201)
Supplement: Supplemental Information 4 — The number 20 refers to 20 °C and thus the CVS condition whereas 37 refers to 37 °C and thus the sham condition. [file peerj-07-7201-s004.xlsx]

## Sheet: Suppl 2 OpenData
Participant_number	Comment	Inclusion	Randomisation_Order	Random_Order_Stimulation	Random_Order_Hand	Gender	Age	Years_Education	Handedness	Motion_Sickness	@20_right_1	@20_right_2	@20_right_3	@20_right_4	@20_right_5	@20_right_6	@20_right_actual_visual	@20_right_actual_physical	@20_right_1_diff_visual	@20_right_2_diff_visual	@20_right_3_diff_visual	@20_right_4_diff_visual	@20_right_5_diff_visual	@20_right_6_diff_visual	@20_right_average_firstthreetrials_diff_visual	@20_right_average_lastthreetrials_diff_visual	D20_right_average_allsixtrials_diff_visual	@20_right_slope_diff_visual	@20_right_intercept_diff_visual	@20_right_1_diff_physical	@20_right_2_diff_physical	@20_right_3_diff_physical	@20_right_4_diff_physical	@20_right_5_diff_physical	@20_right_6_diff_physical	@20_right_average_firstthreetrials_diff_physical	@20_right_average_lastthreetrials_diff_physical	D20_right_average_allsixtrials_diff_physical	@20_right_slope_diff_physical	@20_right_intercept_diff_physical	@20_left_1	@20_left_2	@20_left_3	@20_left_4	@20_left_5	@20_left_6	@20_left_actual_visual	@20_left_actual_physical	@20_left_1_diff_visual
7		1	11	0	0	1	25	20	0	5	385	421	415	417	424	440	337	487	48	84	78	80	87	103	70	90	80	8.2	51.4	102	66	72	70	63	47	80	60	70	-8.2	98.6	174	182	168	168	156	159	178	26	4
14		1	3	0	0	1	24	15	0	2	364	376	382	394	403	387	328	479	36	48	54	66	75	59	46	66.6667	56	5.9	35.5	115	103	97	85	76	92	105	84.3333	95	-5.9	115.5	95	90	101	92	89	83	161	9	66
15		1	7	0	0	0	21	18	0	4	372	390	395	390	402	398	327	478	45	63	68	63	75	71	58.6667	69.6667	64	4.6	48.1	106	88	83	88	76	80	92.3333	81.3333	87	-4.6	102.9	163	161	147	149	151	155	179	28	16
16		1	15	0	0	0	20	14	0	2	316	338	342	345	348	361	318	469	-2	20	24	27	30	43	14	33.3333	24	7.4	-2.1	153	131	127	124	121	108	137	117.667	127	-7.4	153.1	157	145	151	131	122	124	154	4	-3
17		1	19	0	0	0	23	17	0	3	354	346	372	366	370	370	330	480	24	16	42	36	40	40	27	39	33	4.2	18.4	126	134	108	114	110	110	123	111	117	-4.2	131.6	145	144	130	125	118	110	164	13	19
22		1	23	0	0	1	27	19	0	1	385	382	372	384	397	390	329	480	56	53	43	55	68	61	50.6667	61.3333	56	2.3	47.8	95	98	108	96	83	90	100.333	89.6667	95	-2.3	103.2	163	149	147	144	131	124	177	23	14
4		1	13	1	0	1	20	13	0	2	349	367	389	385	393	404	339	489	10	28	50	46	54	65	29.3333	55	42	10	7.3	140	122	100	104	96	85	120.667	95	108	-10	142.7	147	128	134	136	130	121	169	17	22
8	continuing dizziness after experiment	1	9	1	0	0	22	17	0	0	356	357	385	383	390	408	328	479	28	29	57	55	62	80	38	65.6667	52	10.2	16.1	123	122	94	96	89	71	113	85.3333	99	-10.2	134.9	131	119	106	95	90	87	161	11	30
9		1	5	1	0	0	22	12	2	2	347	348	344	355	354	351	341	495	6	7	3	14	13	10	5.33333	12.3333	9	1.4	3.9	148	147	151	140	141	144	148.667	141.667	145	-1.4	150.1	141	151	136	131	143	143	157	6	16
13		1	1	1	0	1	23	19	0	0	385	401	401	425	416	413	339	490	46	62	62	86	77	74	56.6667	79	68	6	46.9	105	89	89	65	74	77	94.3333	72	83	-6	104.1	131	112	105	109	94	80	164	14	33
20		1	17	1	0	0	23	17	0	1	362	375	386	396	382	394	340	491	22	35	46	56	42	54	34.3333	50.6667	43	5.5	23.4	129	116	105	95	109	97	116.667	100.333	109	-5.5	127.6	139	125	115	109	113	110	149	-1	10
21		1	21	1	0	1	21	15	0	0	364	376	363	368	374	380	323	472	41	53	40	45	51	57	44.6667	51	48	2.3	39.9	108	96	109	104	98	92	104.333	98	101	-2.3	109.1	144	102	88	95	84	82	146	-6	2
1		1	8	0	1	1	24	17	0	8	393	410	426	440	456	451	329	483	64	81	97	111	127	122	80.6667	120	100	12.6	56.1	90	73	57	43	27	32	73.3333	34	54	-12.6	97.9	90	80	66	48	45	31	155	3	65
2		1	12	0	1	1	24	19	0	3	383	393	393	396	389	400	346	497	37	47	47	50	43	54	43.6667	49	46	2.2	38.7	114	104	104	101	108	97	107.333	102	105	-2.2	112.3	125	92	103	88	81	71	168	17	43
3		1	4	0	1	1	19	14	0	7.5	354	372	361	371	392	386	331	483	23	41	30	40	61	55	31.3333	52	42	6.6	18.7	129	111	122	112	91	97	120.667	100	110	-6.6	133.3	164	157	151	155	142	144	169	19	5
11		1	16	0	1	0	38	29	0	5	341	342	349	371	372	368	325	476	16	17	24	46	47	43	19	45.3333	32	7.1	7.5	135	134	127	105	104	108	132	105.667	119	-7.1	143.5	150	150	153	140	145	128	160	8	10
19		1	20	0	1	1	22	15	0	3	387	419	405	417	402	412	358	508	29	61	47	59	44	54	45.6667	52.3333	49	2.5	40.4	121	89	103	91	106	96	104.333	97.6667	101	-2.5	109.6	140	143	110	132	118	132	157	6	17
23		1	24	0	1	0	23	17	0	7	328	347	341	326	319	325	345	496	-17	2	-4	-19	-26	-20	-6.33333	-21.6667	-14	-3.3	-2.6	168	149	155	170	177	171	157.333	172.667	165	3.3	153.6	159	160	158	158	157	165	157	7	-2
5		1	2	1	1	1	22	15	0	3	359	372	370	383	388	391	335	488	24	37	35	48	53	56	32	52.3333	42	6.3	20.1	129	116	118	105	100	97	121	100.667	111	-6.3	132.9	133	128	115	117	112	115	163	11	30
6.1	excluded because no CVS reaction	0	6	1	1	1	54	15	0	1	385	408	416	430	432	426	353	505	32	55	63	77	79	73	50	76.3333	63	8.3	34.1	120	97	89	75	73	79	102	75.6667	89	-8.3	117.9	103	86	69	63	45	28	162	10	59
6.2		1	6	1	1	1	26	16	0	1	380	409	408	427	429	420	332	483	48	77	76	95	97	88	67	93.3333	80	8	52.3	103	74	75	56	54	63	84	57.6667	71	-8	98.7	142	114	100	92	101	72	178	26	36
10		1	14	1	1	1	24	20	0	6	341	344	367	359	360	369	335	486	6	9	32	24	25	34	15.6667	27.6667	22	5.1	3.7	145	142	119	127	126	117	135.333	123.333	129	-5.1	147.3	138	128	119	105	107	105	157	5	19
12		1	10	1	1	0	33	19	0	0	391	394	382	409	407	400	329	479	62	65	53	80	78	71	60	76.3333	68	3.2	57.1	88	85	97	70	72	79	90	73.6667	82	-3.2	92.9	113	105	84	64	52	56	158	7	45
18		1	18	1	1	1	20	15	0	8	374	400	416	449	446	439	340	491	34	60	76	109	106	99	56.6667	104.667	81	14.2	31.1	117	91	75	42	45	52	94.3333	46.3333	70	-14.2	119.9	149	119	110	110	96	103	166	15	17
24		1	22	1	1	0	64	22	0	7	340	356	379	375	384	384	333	484	7	23	46	42	51	51	25.3333	48	37	8.6	6.7	144	128	105	109	100	100	125.667	103	114	-8.6	144.3	123	114	93	103	80	75	155	4	32
		0=excluded				0=male			0=always right
		1=included				1=female			2=2 items usually right
[truncated: 191 more columns]
